# Supplementary material
Source: PubMed Central journal article supplement (PMC4151519)

Supplementary Figure 1

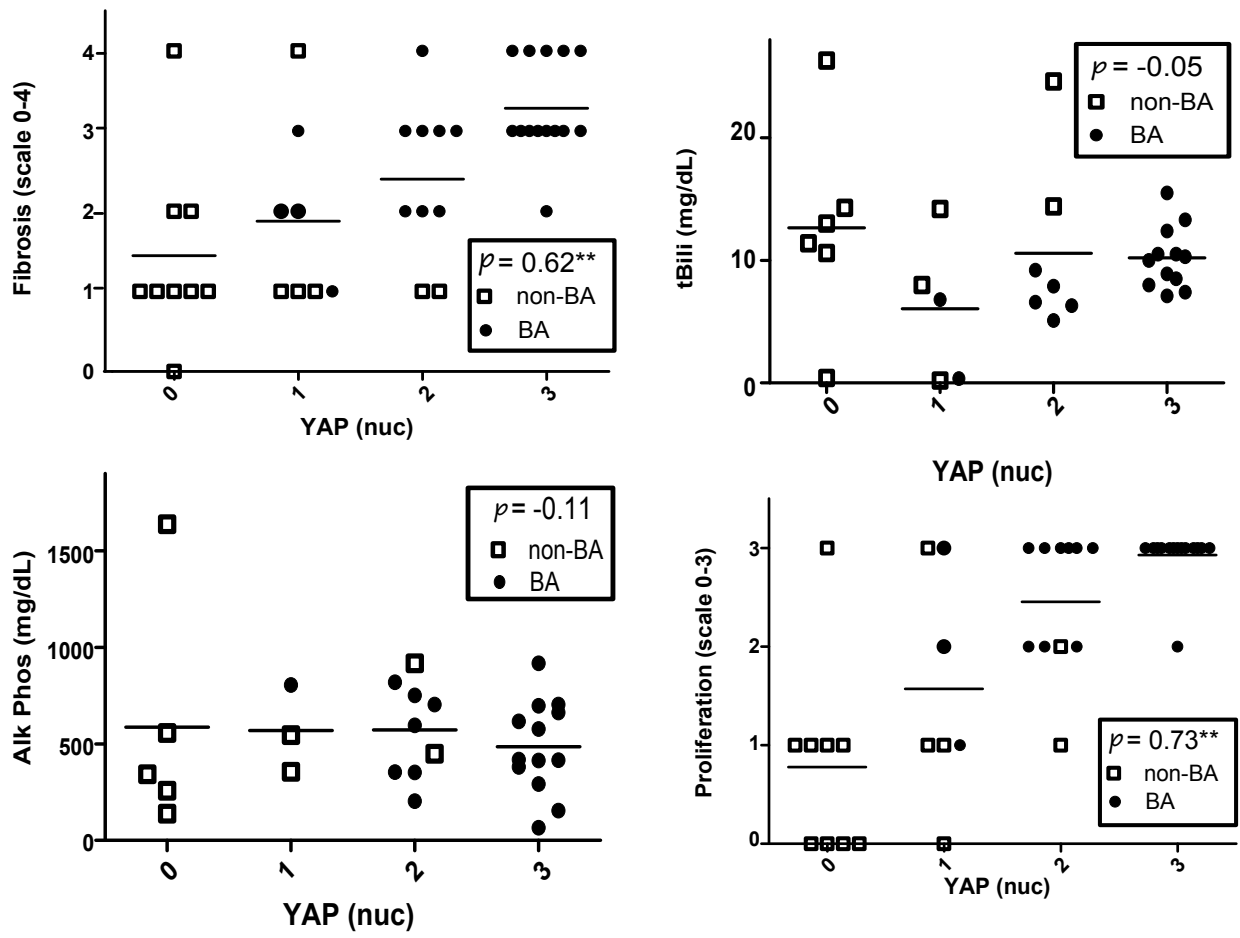

Supplement: NIHMS580928-supplement-01.pdf [file NIHMS580928-supplement-01.pdf]

Supplementary Figure 2

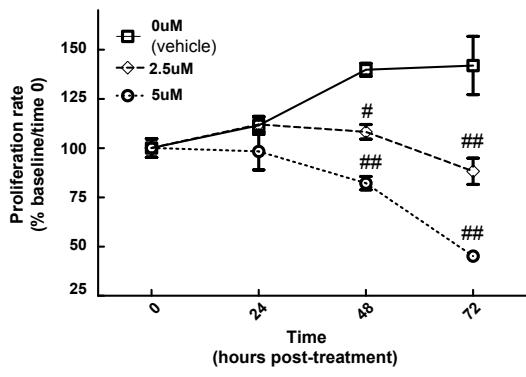

Supplement: NIHMS580928-supplement-02.pdf [file NIHMS580928-supplement-02.pdf]
